# Supplementary material for: From Bound States to Quantum Spin Models: Chiral Coherent Dynamics in Topological Photonic Rings
Source: Research Square preprint supplement (doi:10.21203/rs.3.rs-7373395/v1), 2025-09-11
Supplement: Supplementary file 1 [file 4ff8d187c12cc40ca94d0587.docx]

**Supporting Information**

**From Bound States to Quantum Spin Models: Chiral Coherent Dynamics in Topological Photonic Rings**

*Fatemeh Davoodi1,2,**

*1Nanoscale Magnetic Materials, Institute of Materials Science, Kiel University, 24143, Kiel, Germany*

*2Kiel Nano, Surface and Interface Science KiNSIS, Christian Albrechts University, Kiel, Germany*

**fda@tf.uni-kiel.de*

In this Supporting Information, we provide further details on tight binding Hamiltonian in SSH plasmonic chain, linear and ring shape, chiral emitter–bath interaction in the thermodynamic limit, single-emitter bound states and non-Markovian dynamics, light–matter interaction: from quantized dipoles to effective spin coupling, Purcell-enhanced coupling and far-field transfer by gold nanosphere:

1. Tight Binding Hamiltonian in SSH Plasmonic Chain, Linear and Ring Shape
2. Chiral Emitter–Bath Interaction in the Thermodynamic Limit
3. Single-Emitter Bound States and Non-Markovian Dynamics
4. Light–Matter Interaction: From Quantized Dipoles to Effective Spin Coupling
5. Purcell-Enhanced Coupling and Far-Field Transfer by Gold Nanosphere
6. Flowchart of the training and searching process for the proposed algorithm

**Section I: Tight Binding Hamiltonian in SSH Structures**

**I.1 Tight Binding Hamiltonian in SSH Plasmonic Chain**

To model the plasmonic Su–Schrieffer–Heeger (SSH) chain, we employ the tight-binding (TB) approximation, which captures nearest-neighbor hopping between localized plasmonic modes in nanoparticles arranged in a dimerized lattice. The TB Hamiltonian for a linear SSH chain is written as:1,2

(1)

where:

,

and denote the **intra-cell** and **inter-cell** coupling constants, respectively.

This can also be written in a **matrix form** using Pauli operators acting on sublattices:

(2)

To analyze the band structure, we apply a Bloch ansatz for bulk eigenstates:

The full eigenstate is , with:

The momentum-space Hamiltonian becomes:3

(3)


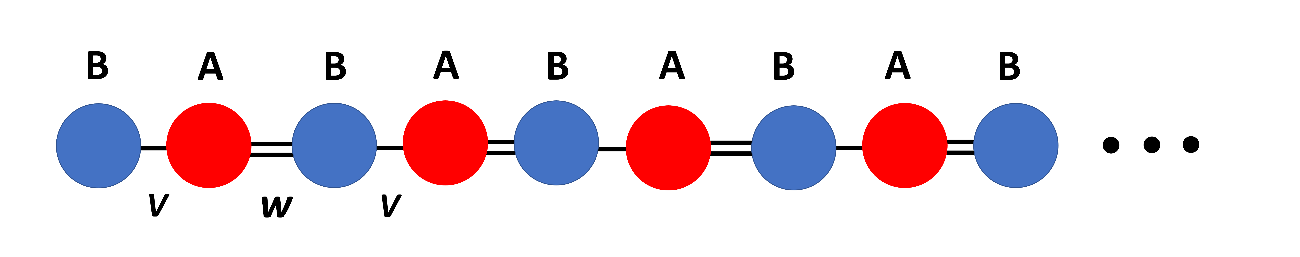


**Figure S1**: Linear SSH chain with dimerized hopping amplitudes. Schematic of a one-dimensional Su–Schrieffer–Heeger (SSH) chain consisting of alternating A (red) and B (blue) sublattice sites. The chain exhibits dimerized nearest-neighbor hopping characterized by intra-cell coupling 𝑣 and inter-cell coupling 𝑤, leading to a two-site unit cell. The alternation of strong and weak bonds defines the dimerization parameter 𝛿=(𝑣−𝑤)/(𝑣+𝑤), which determines the topological phase of the chain. When 𝑣<𝑤, the chain is in the nontrivial topological phase supporting edge states under open boundary conditions.

The off-diagonal term encodes the alternating hopping:

(2)

where and where are the intra-dimer and inter-dimer coupling amplitudes, respectively. (Here is the dimerization parameter).

Diagonalizing Equation (1) yields two photonic bands (upper and lower) given by the dispersion . Here is the positive band energy, found to be:

(3)

In the continuum limit , is continuous on . For a finite ring of unit cells, takes quantized values , but still satisfies Equation (3). The two bands are symmetric about (a consequence of sublattice chiral symmetry). They span frequencies (lower band) and (upper band), leaving a bandgap of width around zero (which closes when , recovering a uniform chain) (See Fig.1 (b,d) in the main text.)

**I.2.Tight Binding Hamiltonian in ring**

To simulate a **finite SSH ring**, we introduce **periodic boundary conditions** and model the system as a **tight-binding loop** with complex phase hopping.

The Hamiltonian becomes:4

(4)

with **,** are bosonic creation and annihilation operators on sublattice in unit cell *n*, is a Peierls phase encoding the ring geometry, is the total number of sites in the ring, the site number with .

In this formulation, (the dimerization parameter) is **encoded geometrically** via the **angular spacing** and coupling variation in the ring. A nonzero corresponds to asymmetry in the hopping parameters and .

The superlattice geometry (periodic modulation of coupling) or interference between multiple domain walls and the band eigenvalues on the Bloch circle (from diagonalizing in Equation (4)) show the Bloch vector wrapping around the origin more than once (Fig. S3), leads to have higher winding number and more edge states21.


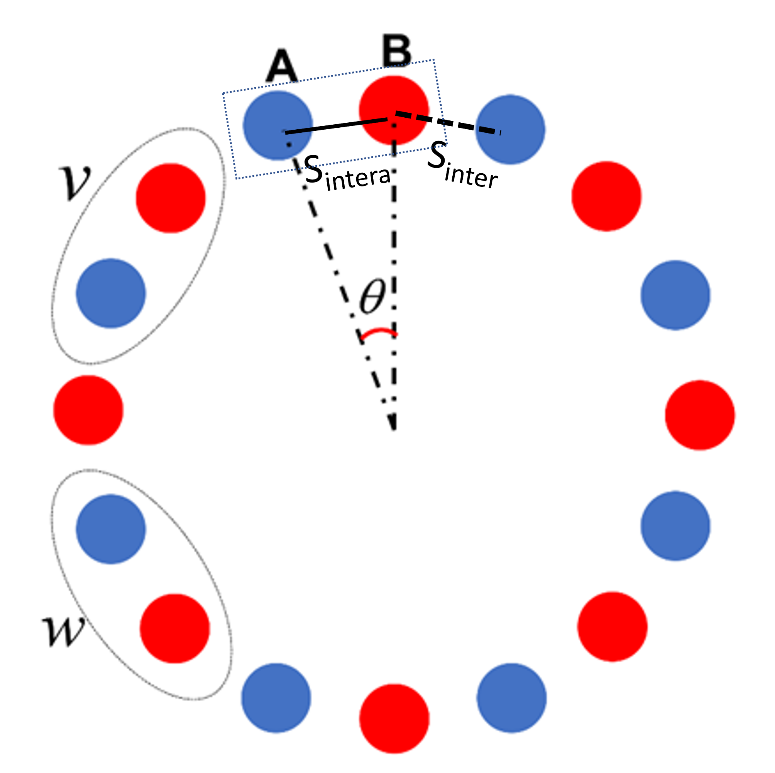


**Figure S2:** Schematically illustrates the SSH ring structure composed of 2N=16 sites. Each unit cell consists of a red (A) and blue (B) nanodisk, with alternating intra-cell and inter-cell spacings. The angular separation between adjacent nanodisks defines the effective dimerization and topological phase of the chain.


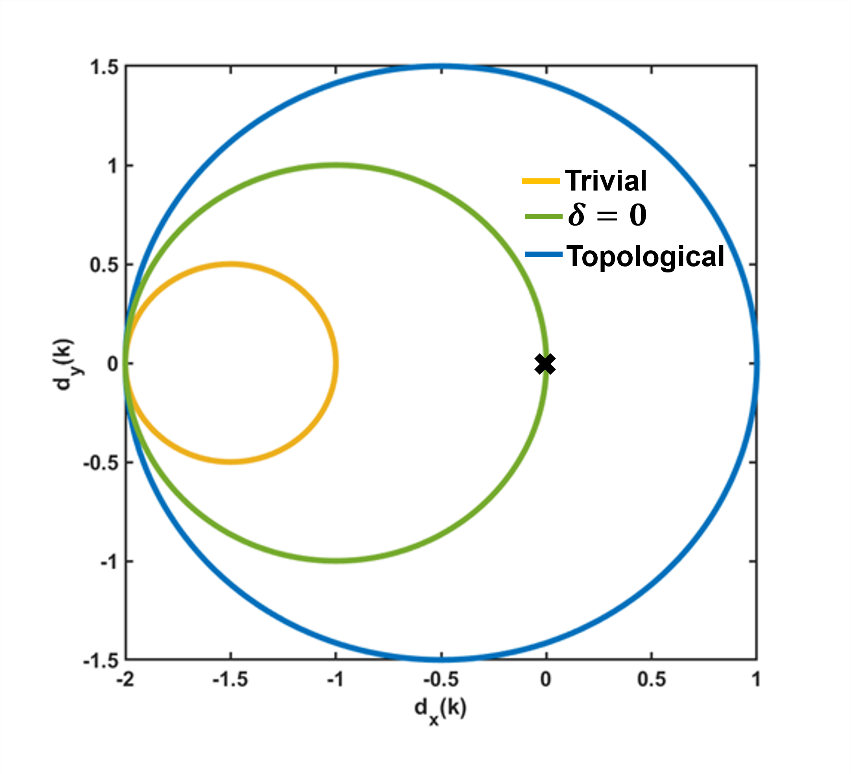


**Figure S3: Winding behavior of the SSH model in -space for different dimerization regimes.** The parametric curves represent the trajectory of the Bloch Hamiltonian vector across the Brillouin zone for three cases: topological (blue), critical (, green), and trivial (yellow). The number of times each curve encircles the origin determines the **winding number** , a topological invariant characterizing the SSH phase. Only the **topological case** (blue) encloses the origin, yielding , while the **trivial case** (yellow) does not, giving . The **gapless transition point** (green) lies exactly tangent to the origin. The black ‘’ marks the origin in -space. This plot visualizes how the SSH model’s topological classification arises from phase winding in momentum space.

**Section II: Chiral Emitter–Bath Interaction in the Thermodynamic Limit**

In this section, we analytically derive the effective emitter-emitter interaction mediated by the SSH bath in the thermodynamic limit 𝑁→∞, and explain how chiral and nonreciprocal behavior emerges from topological band structure and the Lindblad master equation.

**II.1 Non-Hermitian Dynamics and Chirality**

As observed in Fig. 2 of the main text, the excitation of emitter 1 strongly couples to topological edge modes, while emitter 2 shows a delayed and weaker response. This asymmetry results from the unidirectional flow of energy allowed by the chiral SSH bath, where the emitter-bath interaction is described by a non-Hermitian master equation:5

(5)

This cascade-type Lindblad form predicts nonreciprocal energy exchange, where emitter 1 can influence emitter 2, but not vice versa, manifesting as the chiral β⁺ interaction (see Fig. 2e-f).

**II.2 Evaluating Emitter–Emitter Interaction Kernels**

To gain analytical insight into this behavior, we consider the thermodynamic limit of the SSH Hamiltonian:6

(6)

We analytically compute the emitter–emitter interaction Green’s function by converting the real-space lattice sum to a momentum integral.

**II.3 Same-Sublattice (AA or BB) Coupling**

For two emitters on the same sublattice a=b, we obtain:7,8

(7)

**SII.4 Cross-Sublattice (AB or BA) Coupling**

For emitters on opposite sublattices:

(8)

Here, , are Heaviside functions that enforce energy conservation within the light cone.

**II.5 Role of : Localized vs Radiative Modes**

The complex parameters encode the exponential decay of bound states:

(9)

Whether or determines if a bound state is localized (inside bandgap) or delocalized (in band). When lies in the bandgap, , and only **coherent exchange** persists. Otherwise, **dissipative decay** dominates.

**II.6 Interpretation for Finite Ring**

For a finite SSH ring, the momentum becomes discrete:

The integrals over are replaced by discrete sums, and step become **Kronecker deltas**. However, the essential physics remains: **chirality** and **nonreciprocal exchange** arise from the **complex phase** of the eigenmodes, and sharp features in near the band edges indicate the emergence of **topological bound states**.

The asymmetry in coupling seen in Fig. 2d (main text) arises from the imaginary part of , while the **energy shifts (Lamb shifts)** originate from its **real part:**

- Coherent coupling:
- Dissipative rate:

This establishes a **microscopic origin** for chiral Lindblad dynamics in Eq. (8) of the main text.

**Section III: Single-Emitter Bound States and Non-Markovian Dynamics**

When a single quantum emitter (QE) is coupled to the SSH ring and its transition frequency lies inside a photonic bandgap, spontaneous emission into propagating modes is forbidden. Instead, the system supports a localized bound state (BS): a hybrid light-matter excitation where the photon field is exponentially localized around the emitter. This phenomenon arises from the absence of decay channels, and is a hallmark of non-Markovian and topological physics in structured baths.

**III.1. Single-Excitation Ansatz**

To study this phenomenon, we restrict the Hilbert space to the single-excitation sector, where the total system contains one quantum of excitation (either in the emitter or in the bath). We use the ansatz:

(10)

where:

: emitter is excited, bath is in vacuum,

: emitter is in the ground state and a single photon is at site

: amplitude of emitter being excited;

: amplitude for a photon at lattice site

**III.2. Self-Energy and the Bound-State Equation**

Inserting this ansatz into the Schrödinger equation with the full Hamiltonian , and going to the Laplace domain yields an **effective energy-dependent self-consistency equation**:

(11)

Where is the emitter detuning from the band center, and is on-site self energy, capturing the back action of the bath on the emitter. The emitter’s Green’s function is defined as:

(12)

This equation admits **real-valued solutions**  only **inside bandgaps**, where indicating no dissipation and the existence of a bound state.

In practice, Equation (12) can have up to three solutions for – one in each bandgap (lower, middle, upper) – because diverges at all band edges.

**III.3. Explicit Wavefunction of the Bound State**

Assuming the emitter is coupled to site *j*=0, sublattice A, the wavefunction components are (as shown in equation 14 in the main text):5,7

(13)

(14)

where is the Bloch off-diagonal coupling function, is the dispersion relation, is the phase winding angle related to topology (see also the winding number discussion in Section SI). The **photonic component of the bound state** is spatially localized, with decay length set by the inverse of the **imaginary part of the complex momentum**, which becomes large near the band edges.

**III.4. Normalization and Physical Interpretation**

The wavefunction is normalized such that:

(15)

The **emitter excitation probability** at long times (steady-state) is:

(16)

This is a direct consequence of the system forming a **dark bound state**, the emitter cannot fully decay because no bath states are resonantly accessible. For example, at detuning Δ=0 (center of the middle bandgap), one finds:

(17)

showing that **decreasing *δ* (closing the gap)** reduces the excitation retention. As *δ*→0, the bandgap closes, and the emitter decays fully returning to the **Markovian limit**. The non-exponential, oscillatory behavior observed in time-domain simulations when (Fig. 3 in the main text), stems from the non-Markovian memory kernel of the SSH bath.

**III.5. Chiral localization**

A striking feature of the SSH bath is that a mid-gap bound state () localizes asymmetrically to one side of the emitter, a chirallocalization determined by the topology (sign of ). In the ring, this means the bound photonic excitation propagates predominantly in one direction around the loop. To see this, consider the analytic solution at (exact mid-gap) for an emitter on sublattice A at cell 0. In the trivial phase, the bound state has energy and the wave amplitudes evaluate to:15

(18)

and for . This solution is nonzero only on the *B* sublattice and only for lattice sites in front of the QE (here labels the cells in the clockwise direction, assuming we number cells such that at the emitter). In topologically nontrivial phase, the roles are reversed: the bound state populates only A-sublattice sites on one side of the emitter (and decays in the opposite direction). In either case, the localization length is . For small for , which can become comparable to the circumference of the ring. If approaches (when the gap nearly closes), the bound state’s evanescent tail can wrap around the ring and meet the “back” of the emitter. In that regime the strictly one-sided solution (18) is not unique, the clockwise and counter clockwise decaying solutions hybridize into two standing-wave modes (one symmetric, one antisymmetric). However, for a moderate ring size (for example, 16 cells) and a reasonably sized gap, the bound state is effectively chiral and confined to one side of the QE. This can be intuitively understood as the emitter acting as a topological boundary in the middle of the ring, with the bound state resembling an “edge state” localized adjacent to that boundary.

**Section IV: Light–Matter Interaction: From Quantized Dipoles to Effective Spin Coupling**

**IV.1. Quantized Plasmonic Dipole of Gold Nanospheres**

In our system, 60 nm gold nanospheres are positioned near selected nanoholes in a patterned plasmonic SSH ring. Though these are classically described particles, when subwavelength and operating near resonance, their dominant dipolar plasmonic modes can be modeled quantum mechanically. Each nanosphere supports localized surface plasmon (LSP) resonances, and their quantized response is captured by a bosonic Hamiltonian:

(19)

where , satisfying are annihilation and creation operators of the plasmon mode with resonance frequency . The Hamiltonian is derived from the classical energy with considering transverse electric and magnetic field operators: 9

(20)

(21)

For nanospheres much smaller than the wavelength (diameter ≪ wavelength), the dipole mode (λ=1 for dipole) dominates the optical response.

The quantized dipole operator in the time domain becomes:

(22)

where , are bosonic operators, and is effective dipole moment vector and is related to the polarizability of the particle:

(23)

When the excitation is driven by **helicity-resolved structured fields** (e.g. the topological mode from the SSH ring), the plasmon couples preferentially to either or polarizations. This spin selection makes the plasmon act like a circular dipole with transition operators: , .

Thus, each nanosphere can act like an effective two-level system, with:

- Ground state: no excitation ∣0⟩
- Excited state: one plasmon excitation ∣1⟩

When exposed to a structured photonic environment (e.g., an SSH ring), the nanosphere interacts with the local electric field and the interaction Hamiltonian reads:

(24)

which describes the exchange of energy between the nanosphere’s plasmonic mode and the structured field. In the rotating-wave approximation (RWA), this can be recast in terms of emitter–mode coupling as:10,11

(25)

is index of the emitter, represents the complex coupling strength between emitter and , , , are the raising/lowering operators for the emitter and annihilation/creation operators for the bath modes, respectively.

The **bath** refers to the continuum of **plasmonic modes**, like all the ways light or plasmons (quasi-particles of electron density waves) can move in the system. Which can be expressed by:

(26)

**IV.2. Mode-Resolved Excitation Spectrum of a Chiral Dipole in a Finite SSH Ring**

The topological modes in SSH ring, exhibit vortex-like electric fields, described by a twisted phase structure , and is the radial wavevector. These modes carry orbital angular momentum (OAM), and the spin angular momentum (polarization) , enabling spin–orbit coupling at the nanoscale. , determines the quantized angular momentum and act as the winding number in the SSH ring, since phase winds around the origin times as the spatial azimuthal angle circles the z-axis once. This comes from the periodic boundary condition in the SSH ring chain:

, 0, 1,…, *N*-1 (27)

Each quantized angular momentum can be decomposed into components corresponding to clockwise or counter-clockwise rotating dipole moment. A polarized far-field preferentially excites the (rotating in a right-handed sense).

**IV.3. Chiral Excitation of the SSH Ring**

To excite the SSH ring, we define a chiral dipole excitation of the form:

(28)

: angular momentum of the emitter (e.g.,),

: azimuthal angle of site

: field localized at site

This excitation profile simulates vortex beams (such as Laguerre-Gaussian modes) or circularly polarized dipoles localized above the ring. The projection of this excitation onto the SSH eigenmodes allows us to determine which modes are excited.

**IV.4. Mode Projection and Spectral Selection**

Let the eigenstates of be with eigenvalues . The probability that mode 𝑛 is excited by a dipole of angular momentum 𝑚 is:12

(29)

By calculating for each eigenstate and plotting the corresponding energy spectrum (as shown in Figure S4(a)) we observe a clear asymmetry in the spectral response depending on the excitation handedness. Specifically, counter-propagating dipolar excitation (shown in gray/black) selectively couples only to extended bulk modes, whereas co-propagating (chiral) excitation robustly addresses two spectrally isolated modes located within the bandgap (highlighted in red). These modes are unambiguously identified as topological bound states, consistent with theoretical predictions for chiral SSH systems where symmetry and directional excitation play a crucial role.


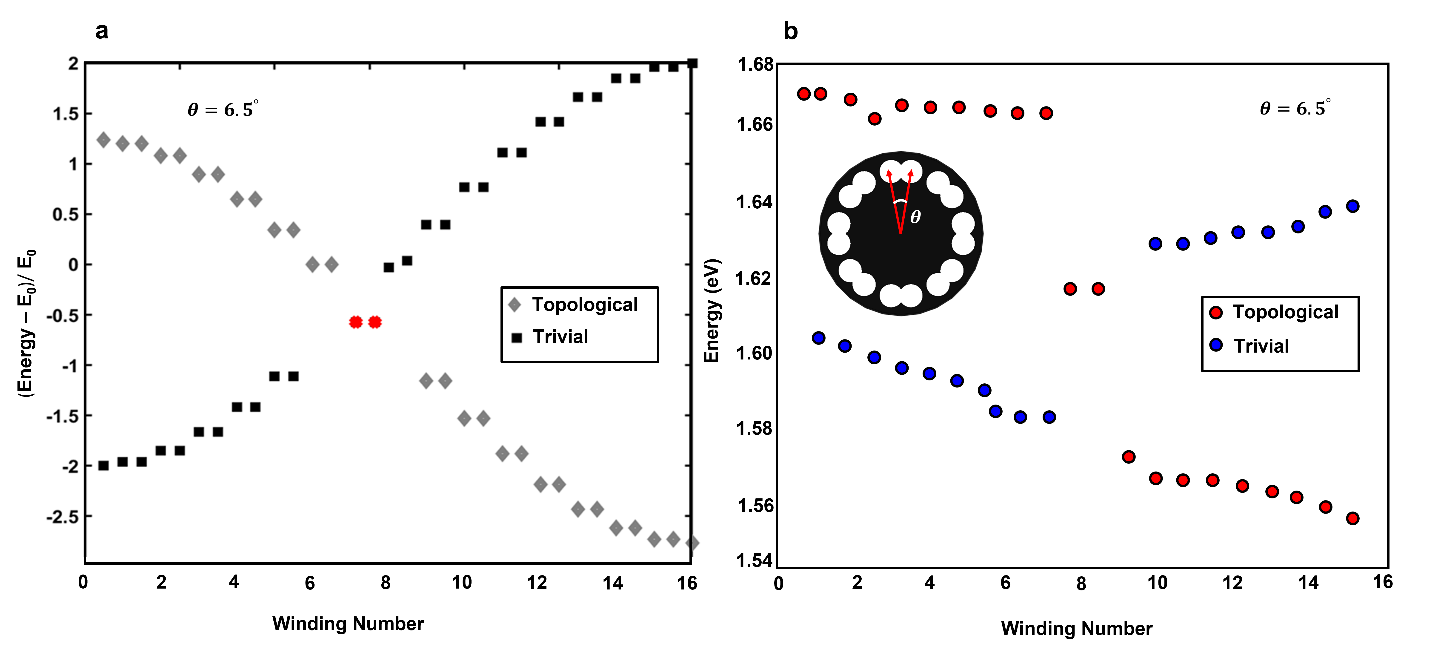


**Figure S4:** **Topological mode selection in an SSH nanohole ring.** Comparison of theoretical and numerical results for a Su–Schrieffer–Heeger (SSH) ring composed of 16 unit cells. Each unit cell consists of circular nanoholes (diameter 𝐷=248nm) perforated into a 40 nm-thick gold disk with radius 𝑏=1380 nm. The left panel displays the theoretically calculated eigenvalue spectrum of the SSH tight-binding Hamiltonian, incorporating a dimerization parameter corresponding to a 6.5° angular modulation. Red markers highlight spectrally isolated topological edge modes that appear exclusively under co-propagating (chirality-matched) excitation. In contrast, counter-propagating excitation (gray/black) excites only extended bulk modes. The right panel shows eigenvalues of the SSH chain ring resonator for a range of loop numbers ( = 1–16). Topological modes were discerned for equal to 8, with a dimerization parameter of 6.5° in a chain comprising 16 unit cells. The emergence of two distinct in-gap modes (topological bound states) is associated with the excitation of counter-rotating eigenmodes carrying angular momentum 𝑚=±𝜁, reflecting the system’s nontrivial winding number and chiral symmetry. The theoretical and simulated results together confirm robust spectral isolation and directional selectivity of topological modes in the plasmonic SSH ring.

The theoretically calculation and numerically simulation results clearly show that the topological states are well- separated from the bulk spectrum. Their spectral isolation makes them ideal candidates for robust chiral single-photon sources as the chiral topological bath, as they minimize undesired coupling to bulk modes. The emergence of two distinct topological modes within the revealed band gap, as depicted in Figure S3, can be attributed to the excitation of two counter-rotating circular modes (). The manifestation of positive and negative winding numbers becomes apparent upon analysis of the orbital angular momentum associated with these modes.

This chiral mode selectivity, arising from the interplay of angular momentum and topology which provides a natural link to the many-emitter effective spin Hamiltonian. When the excitation is circularly polarized (e.g., σ⁺), the induced dipole inherits spin angular momentum from the incident field, aligned with the optical field: . In vortex-like SSH eigenmodes, this spin is transverse and locked to the orbital angular momentum (OAM) of the mode. Consequently, spin–OAM locking ensures that σ⁺-polarized excitation preferentially couples to clockwise-propagating topological edge modes, while σ⁻ addresses counterclockwise modes. The resulting emitter–emitter interaction is effectively chiral and long-range, mediated by the nontrivial SSH bath. Within the single-excitation subspace the interaction Hamiltonian on Eq. (25) reduce to an effective spin-exchange model:13

(30)

where and are raising/lowering operators for the *m-*th and *n-*th gold nanospheres, the interaction strength inherits both directionality and range from the vortex field profile and SSH topology. This establishes a direct connection between the topological photonic bath and emergent quantum magnetism among emitters, positioning the system as a promising platform for exploring dissipative quantum many-body dynamics and chiral spin physics in a synthetic gauge field as we developed in the many-emitter effective spin formalism discussed in the main text.

**Section** **V:** **Purcell-Enhanced Coupling and Far-Field Transfer by Gold Nanosphere**

In our hybrid plasmonic–topological platform, gold nanospheres embedded in the SSH nanohole ring do not merely act as passive quantum emitters but function as active nanophotonic antennas that coherently interact with and re-emit structured topological modes. This interaction is governed by a rich interplay of Purcell-enhanced decay, local field overlap, and spin–orbit–momentum coupling.

**V.1.** **Purcell Enhancement in the Topological Bath**

The Purcell factor quantifies the modification of the spontaneous emission rate of a dipole emitter due to its environment:14

(31)

where is the dipole moment, and is the Green’s tensor for the SSH ring. In our system, features sharp resonances due to topological edge states confined along the ring, strongly boosting when the emitter frequency lies near midgap:

(32)

where is the vacuum decay rate. The Purcell factor diverges near **band edges** and reaches a maximum for **mid-gap bound states**, creating a localized enhancement channel for gold spheres. The total decay rate of a dipole near a metallic nanostructure (here, gold sphere) can be decomposed as:

(33)

where and represent power radiated to the far-field and energy dissipated in the metal, respectively. The efficiency of far-field transfer is governed by the quantum efficiency:

(34)

Due to the dipolar nature of the gold sphere resonance (diameter ≈ 60 nm), only the **dipole plasmon mode** couples effectively to the ring field. When aligned to the local field polarization of the SSH topological mode (e.g., via a σ⁺ pump), the nanoparticle acts as a directional antenna with **spin-selective emission**.

**V.2. Transferring the coherency to Far Field**

The interaction strength between an emitter and a structured mode is given by the overlap integral:15

(35)

where is emitter position, and are the electric field of the SSH topological mode and near-field of the gold nanoparticle dipole resonance. Only those nanoparticles that are placed at correct helicity of the bath couple efficiently. This explains the chiral directionality of the interaction and the nanoparticles coupling to the chiral path.

Upon coherent excitation, each gold nanosphere becomes a plasmonic nanoantenna radiating into free space with angular momentum inherited from the SSH mode: i. The azimuthal OAMis mapped into the phase of the radiated beam, ii. The SAM (σ⁺ or σ⁻) maps to circular polarization in the far-field. The scattered field at large *r* follows:

(36)

Thus, the coherent emitter–edge-mode system acts as a directional topological beam launcher, converting topological plasmonic modes into free-space modes with defined spin and orbital angular momentum.

**VI. Flowchart of the training and searching process for the proposed algorithm**


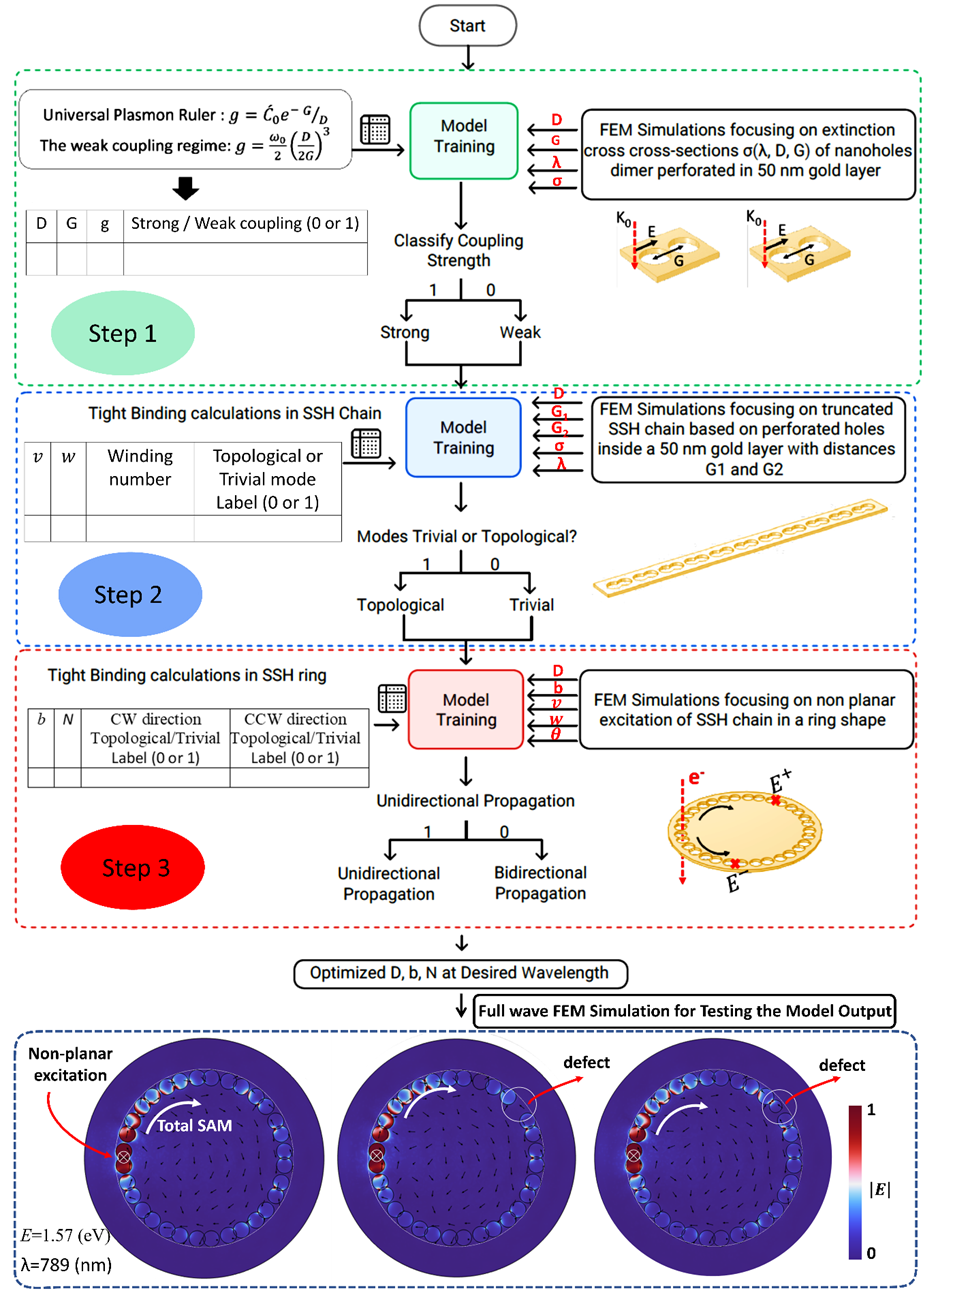


**Figure S5:** The process comprises three stages: (1) classification of coupling strength via finite-element method (FEM) simulations, using a labeled dataset informed by approximate analytical formulas for the strong- and weak-coupling regimes; (2) identification of topological and trivial modes in the SSH chain through combined tight-binding calculations and FEM simulations; and (3) detection of unidirectional propagation in an SSH ring under non-planar excitation. In each stage, simulation data guide model training to optimize the structural parameters 𝐷, 𝐺, 𝑏, and 𝑁 for the target wavelength. The results confirm that the field profile remains aligned with the propagation direction in both cases, demonstrating the robustness of the topological mode.

**References**

1. Fujita, M., Igami, M. & Nakada, K. Lattice Distortion in Nanographite Ribbons. *J Physical Soc Japan* 66, (1997).

2. Jürß, C. & Bauer, D. High-harmonic generation in Su-Schrieffer-Heeger chains. *Phys Rev B* 99, (2019).

3. Downing, C. A., Sturges, T. J., Weick, G., Stobińska, M. & Martín-Moreno, L. Topological Phases of Polaritons in a Cavity Waveguide. *Phys Rev Lett* 123, (2019).

4. Davoodi, F. & Talebi, N. Unidirectional Wave Propagation in a Topological Plasmonic Ring Resonator via a Symmetry-Broken Excitation Scheme. *ACS Appl Nano Mater* 6, 20823–20830.

5. Bello, M., Platero, G., Cirac, J. I. & González-Tudela, A. Unconventional quantum optics in topological waveguide QED. *Sci Adv* 5, (2019).

6. Sirker, J., Maiti, M., Konstantinidis, N. P. & Sedlmayr, N. Boundary fidelity and entanglement in the symmetry protected topological phase of the SSH model. *Journal of Statistical Mechanics: Theory and Experiment* 2014, (2014).

7. Gardiner, C. W. & Zoller, P. Quantum noise: a handbook of Markovian and non-Markovian quantum stochastic methods with applications to quantum optics. *Springer series in synergetics,* vol. 16 Preprint at (2004).

8. Kofman, A. G., Kurizki, G. & Sherman, B. Spontaneous and induced atomic decay in photonic band structures. *J Mod Opt* 41, (1994).

9. Haroche, S. Nobel Lecture: Controlling photons in a box and exploring the quantum to classical boundary. *Rev Mod Phys* 85, (2013).

10. Lodahl, P., Mahmoodian, S. & Stobbe, S. Interfacing single photons and single quantum dots with photonic nanostructures. *Reviews of Modern Physics* vol. 87 Preprint at https://doi.org/10.1103/RevModPhys.87.347 (2015).

11. Chang, D. E., Vuletić, V. & Lukin, M. D. Quantum nonlinear optics - Photon by photon. *Nat Photonics* 8, (2014).

12. Yao, N. Y. *et al.* Many-body localization in dipolar systems. *Phys Rev Lett* 113, (2014).

13. Davoodi, F. *Beyond Decoherence: Control the Collective Quantum Dynamics of Quasi Particles in Topological Interface*. https://arxiv.org/abs/2506.12805 (2025) doi:https://doi.org/10.21203/rs.3.rs-6796190/v1.

14. Dung, H. T., Knoell, L. & Welsch, D. G. Three-dimensional quantization of the electromagnetic field in dispersive and absorbing inhomogeneous dielectrics. *Phys Rev A* 57, (1998).

15. Törmö, P. & Barnes, W. L. Strong coupling between surface plasmon polaritons and emitters: A review. *Reports on Progress in Physics* vol. 78 Preprint at https://doi.org/10.1088/0034-4885/78/1/013901 (2015).
